# Supplementary material
Source: PubMed Central journal article supplement (PMC3773612)
Supplement: NIHMS500781-supplement-supplement_1.pdf [file NIHMS500781-supplement-supplement_1.pdf]

**Supplementary Table 1.** General characteristics of 4,144 male pesticide applicators excluded from analyses due to missing information on smoking and alcohol consumption at enrollment by stroke mortality outcome, Agricultural Health Study, 1993-2008.

|                                             | Cases <sup>b</sup> |      | Noncases <sup>c</sup> |      |
|---------------------------------------------|--------------------|------|-----------------------|------|
|                                             | (N = 82)           | %    | (N = 4062)            | %    |
| Site                                        |                    |      |                       |      |
| NC                                          | 71                 | 86.6 | 2746                  | 67.6 |
| Iowa                                        | 11                 | 13.4 | 1316                  | 32.4 |
| Smoking status <sup>d</sup>                 |                    |      |                       |      |
| Never                                       | 19                 | 46.3 | 928                   | 42.2 |
| Past                                        | 14                 | 34.1 | 817                   | 37.2 |
| Current                                     | 8                  | 19.5 | 454                   | 20.6 |
| Age (years)                                 |                    |      |                       |      |
| <50                                         | 5                  | 6.1  | 1885                  | 46.4 |
| 50-59                                       | 6                  | 7.3  | 952                   | 23.4 |
| 60-69                                       | 33                 | 40.2 | 816                   | 20.1 |
| 70+                                         | 38                 | 46.3 | 409                   | 10.1 |
| Race/Ethnicity                              |                    |      |                       |      |
| White, non-Hispanic                         | 51                 | 78.5 | 2667                  | 88.1 |
| Other                                       | 14                 | 21.5 | 362                   | 12   |
| Education                                   |                    |      |                       |      |
| High school or less                         | 46                 | 83.6 | 2097                  | 83.6 |
| Beyond high school                          | 9                  | 16.4 | 676                   | 16.4 |
| BMI (kg/m <sup>2</sup> )                    |                    |      |                       |      |
| <25                                         | 14                 | 30.4 | 695                   | 26.3 |
| 25-29.9                                     | 19                 | 41.3 | 1320                  | 49.9 |
| ≥30                                         | 13                 | 28.3 | 630                   | 23.8 |
| Drinks per month at enrollment <sup>e</sup> |                    |      |                       |      |
| None                                        | 5                  | 71.4 | 127                   | 45.7 |
| 1-4 drinks                                  | 1                  | 14.3 | 55                    | 19.8 |
| 5-30 drinks                                 | 1                  | 14.3 | 59                    | 21.2 |
| >30                                         | 0                  | 0    | 37                    | 13.3 |
| Heart disease                               |                    |      |                       |      |
| No                                          | 12                 | 75.0 | 775                   | 92.5 |
| Yes                                         | 4                  | 25.0 | 63                    | 7.5  |
| Diabetes                                    |                    |      |                       |      |
| No                                          | 15                 | 93.8 | 794                   | 95.9 |
| Yes                                         | 1                  | 6.3  | 34                    | 4.1  |
| Hypertension <sup>f</sup>                   |                    |      |                       |      |
| No                                          | 12                 | 44.4 | 1028                  | 77.4 |
| Yes                                         | 15                 | 55.6 | 301                   | 22.6 |

---

<sup>a</sup> Data not available for all participants due to missing values in some categories.

<sup>b</sup> Cases are defined as deaths with an underlying or contributing cause attributed to stroke on state death certificates by using *International Classification of Diseases*, Tenth Revision, codes I60-I69.

<sup>c</sup> Non-cases are participants who did not experience a stroke-related death during study follow-up.

<sup>d</sup> Individuals reporting information regarding smoking but not alcohol intake.

<sup>e</sup> Individuals reporting information regarding alcohol intake but not smoking.

<sup>f</sup> The hypertension question asked on the take-home questionnaire was answered by 23,170 participants (161 stroke deaths).

---

**Supplementary Table 2.** Associations of pesticide use and stroke mortality among 51,603 male pesticide applicators, Agricultural Health Study, 1993-2008.<sup>a</sup>

|                               | Cases <sup>b</sup> |    | Non-cases <sup>c</sup> |    | Hazard Ratio <sup>d</sup> | 95% Confidence Interval |      |
|-------------------------------|--------------------|----|------------------------|----|---------------------------|-------------------------|------|
|                               | (N = 308)          | %  | (N = 51,295)           | %  |                           | Interval                |      |
| Insecticides <sup>e</sup>     | 286                | 93 | 47299                  | 92 | 1.02                      | 0.66                    | 1.57 |
| Carbamates                    | 233                | 77 | 33245                  | 65 | 0.94                      | 0.71                    | 1.25 |
| Aldicarb                      | 44                 | 17 | 5791                   | 12 | 1.09                      | 0.77                    | 1.53 |
| Carbaryl                      | 200                | 71 | 27167                  | 55 | 0.96                      | 0.72                    | 1.26 |
| Carbofuran                    | 84                 | 30 | 12941                  | 27 | 1.05                      | 0.81                    | 1.35 |
| Organochlorines               | 210                | 72 | 25322                  | 51 | 0.91                      | 0.69                    | 1.18 |
| Aldrin                        | 79                 | 30 | 8946                   | 19 | 1.03                      | 0.78                    | 1.35 |
| Chlordane                     | 115                | 43 | 12036                  | 25 | 1.01                      | 0.79                    | 1.30 |
| Dieldrin                      | 30                 | 12 | 3189                   | 7  | 0.90                      | 0.61                    | 1.33 |
| DDT                           | 154                | 56 | 11817                  | 24 | 0.92                      | 0.72                    | 1.19 |
| Heptachlor                    | 57                 | 22 | 7301                   | 15 | 0.96                      | 0.70                    | 1.32 |
| Lindane                       | 44                 | 17 | 8799                   | 18 | 0.90                      | 0.65                    | 1.25 |
| Toxaphene                     | 70                 | 27 | 6809                   | 14 | 0.98                      | 0.74                    | 1.30 |
| Organophosphates <sup>e</sup> | 263                | 85 | 44964                  | 88 | 1.03                      | 0.74                    | 1.41 |
| Chlorpyrifos                  | 91                 | 30 | 21225                  | 42 | 0.85                      | 0.66                    | 1.08 |
| Coumaphos                     | 17                 | 6  | 3876                   | 8  | 0.74                      | 0.45                    | 1.21 |
| Diazinon                      | 94                 | 35 | 15330                  | 32 | 0.89                      | 0.69                    | 1.16 |
| Dichlorvos                    | 21                 | 8  | 4761                   | 10 | 1.11                      | 0.70                    | 1.74 |
| Fonofos                       | 45                 | 16 | 10276                  | 21 | 1.18                      | 0.84                    | 1.68 |
| Malathion                     | 206                | 73 | 34127                  | 69 | 0.99                      | 0.76                    | 1.29 |
| Parathion                     | 71                 | 27 | 7358                   | 15 | 1.07                      | 0.80                    | 1.42 |
| Phorate                       | 75                 | 28 | 15669                  | 32 | 1.02                      | 0.76                    | 1.35 |
| Terbufos                      | 78                 | 28 | 18459                  | 38 | 0.98                      | 0.75                    | 1.29 |
| Pyrethroids                   |                    |    |                        |    |                           |                         |      |
| Permethrin (animals)          | 16                 | 6  | 5977                   | 12 | 1.06                      | 0.64                    | 1.77 |
| Permethrin (crops)            | 22                 | 8  | 7087                   | 15 | 0.74                      | 0.48                    | 1.14 |
| Herbicides                    | 295                | 96 | 49390                  | 96 | 0.95                      | 0.54                    | 1.66 |
| Phenoxys                      | 237                | 77 | 39673                  | 77 | 1.13                      | 0.86                    | 1.49 |
| 2,4-D                         | 222                | 74 | 38543                  | 76 | 1.04                      | 0.80                    | 1.36 |
| 2,4,5-T                       | 90                 | 35 | 10184                  | 21 | 1.06                      | 0.82                    | 1.38 |
| 2,4,5-TP                      | 32                 | 13 | 4541                   | 9  | 0.97                      | 0.67                    | 1.41 |
| Triazines                     | 206                | 67 | 39404                  | 77 | 0.93                      | 0.72                    | 1.19 |
| Atrazine                      | 193                | 64 | 35716                  | 70 | 1.03                      | 0.81                    | 1.32 |
| Cyanazine                     | 78                 | 28 | 20584                  | 42 | 0.90                      | 0.67                    | 1.20 |
| Metribuzin                    | 70                 | 27 | 22111                  | 46 | 0.69                      | 0.52                    | 0.93 |
| Alachlor                      | 136                | 48 | 26091                  | 53 | 0.94                      | 0.74                    | 1.19 |
| Butylate                      | 58                 | 22 | 15606                  | 32 | 0.80                      | 0.60                    | 1.08 |
| Chlorimuron-ethyl             | 53                 | 20 | 18675                  | 39 | 0.74                      | 0.54                    | 1.00 |
| Dicamba                       | 89                 | 33 | 24932                  | 51 | 0.90                      | 0.68                    | 1.21 |

|                                       | Cases <sup>b</sup> |    | Non-cases <sup>c</sup> |    | Hazard Ratio <sup>d</sup> | 95% Confidence Interval |      |
|---------------------------------------|--------------------|----|------------------------|----|---------------------------|-------------------------|------|
|                                       | (N = 308)          | %  | (N = 51,295)           | %  |                           |                         |      |
| EPTC                                  | 32                 | 12 | 10155                  | 21 | 0.92                      | 0.63                    | 1.36 |
| Glyphosate                            | 235                | 78 | 38820                  | 76 | 1.09                      | 0.83                    | 1.43 |
| Imazethapyr                           | 55                 | 20 | 21167                  | 44 | 0.81                      | 0.57                    | 1.14 |
| Metolachlor                           | 97                 | 35 | 23060                  | 47 | 0.95                      | 0.74                    | 1.23 |
| Paraquat                              | 91                 | 34 | 12069                  | 25 | 1.16                      | 0.88                    | 1.51 |
| Pendimethalin                         | 93                 | 35 | 22539                  | 46 | 0.86                      | 0.66                    | 1.11 |
| Petroleum oil                         | 100                | 38 | 22669                  | 47 | 0.93                      | 0.72                    | 1.20 |
| Trifluralin                           | 111                | 40 | 25875                  | 53 | 0.80                      | 0.62                    | 1.03 |
| Fumigants                             | 111                | 36 | 11916                  | 23 | 1.08                      | 0.85                    | 1.39 |
| Carbon tetrachloride/carbon disulfide | 31                 | 12 | 2687                   | 6  | 1.15                      | 0.79                    | 1.68 |
| Aluminum phosphide                    | 7                  | 3  | 2820                   | 6  | 0.71                      | 0.34                    | 1.52 |
| Ethylene dibromide                    | 15                 | 6  | 1780                   | 4  | 1.00                      | 0.59                    | 1.69 |
| Methyl bromide                        | 87                 | 29 | 7488                   | 15 | 1.21                      | 0.92                    | 1.60 |
| Fungicides <sup>f</sup>               | 148                | 48 | 18445                  | 36 | 1.06                      | 0.83                    | 1.36 |
| Benomyl                               | 52                 | 19 | 5123                   | 11 | 1.08                      | 0.78                    | 1.49 |
| Captan                                | 26                 | 9  | 5024                   | 10 | 0.96                      | 0.64                    | 1.45 |
| Chlorothalonil                        | 37                 | 12 | 4250                   | 8  | 1.04                      | 0.73                    | 1.48 |
| Maneb/Mancozeb                        | 41                 | 15 | 4689                   | 10 | 0.85                      | 0.60                    | 1.21 |
| Metalaxyl                             | 90                 | 32 | 11281                  | 23 | 1.06                      | 0.80                    | 1.40 |

<sup>a</sup> Data not available for all participants due to missing values in some categories.

<sup>b</sup> Cases are defined as deaths with an underlying or contributing cause attributed to stroke on state death certificates by using *International Classification of Diseases*, Tenth Revision, codes I60-I69.

<sup>c</sup> Non-cases are participants who did not experience a stroke-related death during study follow-up.

<sup>d</sup> Results were obtained from Cox proportional hazards regression adjusted for state, smoking status, and alcohol intake. The referent group for the pesticide class hazard ratio is made up of those with no exposure to that class, and the referent for individual pesticide hazard ratios is made up of those with no exposure to each individual pesticide.

<sup>e</sup>Includes ever use of trichlorfon

<sup>f</sup>Includes ever use of ziram
